February 2013

# PSYCHIATRIC SERVICES

A Journal of the  
American Psychiatric  
Association

- ◆ Calculating Social Costs of Expanding Access to Supported Employment
- ◆ Intensive Community Services Reduce Use of Involuntary Commitment
- ◆ Treatment for Veterans With Mental Disorders: Four New Investigations
- ◆ Costs of Screening and Care for Blood-Borne Illnesses: Using the STIRR Model

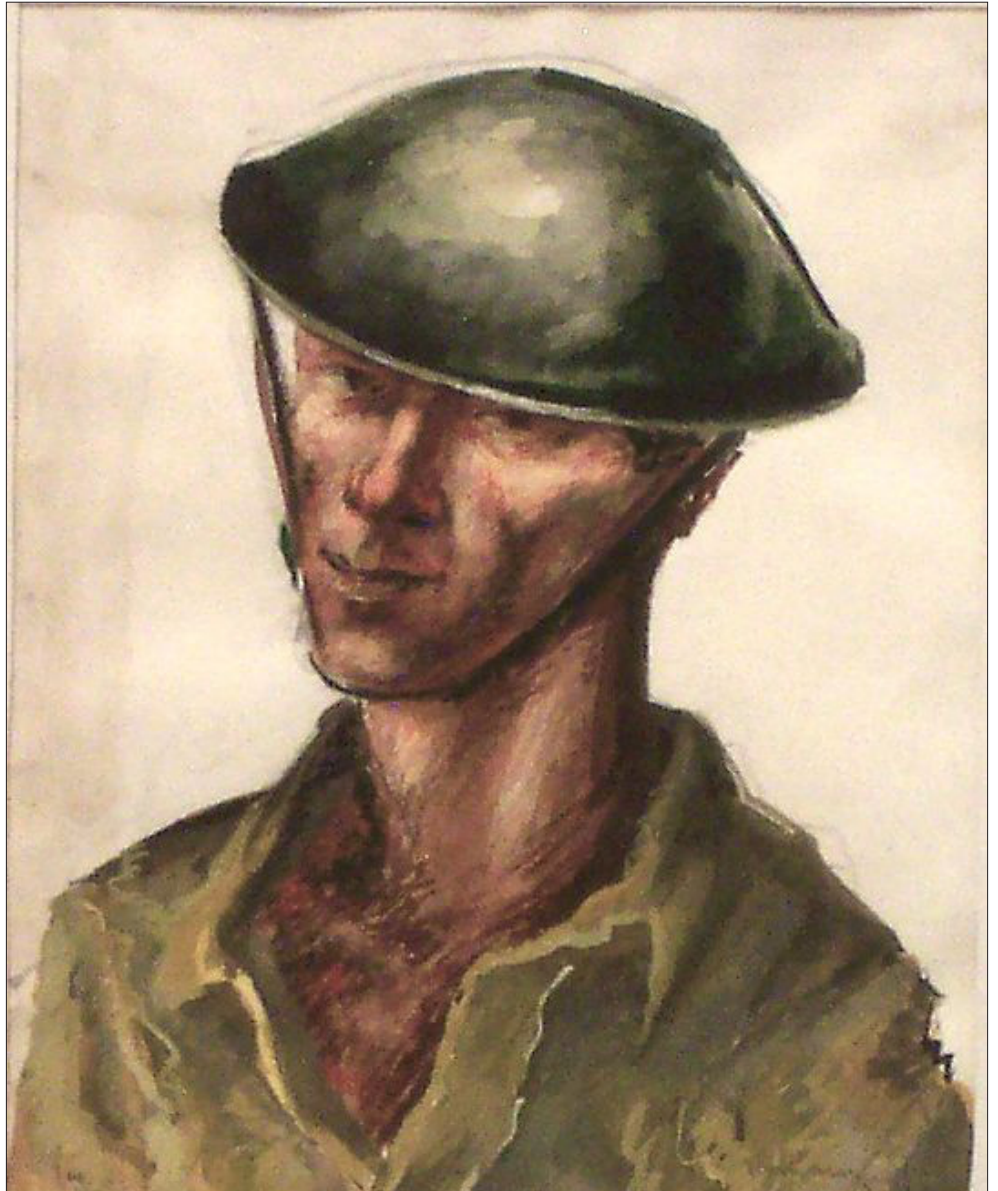

Source: https://psychiatryonline.org/doi/suppl/10.1176/ps.2013.64.issue-2/suppl_file/cover.pdf
