# TAKING ISSUE

## Supported Employment: Evidence on Economic Impacts

In 2013, the difficult U.S. budget situation, coupled with a negative cash balance in the Social Security Disability Insurance (SSDI) program, has directed policy makers' attention to reforming disability programs. The rapid growth of both the SSDI program and the Supplemental Security Income (SSI) program has created interest in the origins of the financial pressures being put on these programs and on the federal budget. Beneficiaries with severe and persistent mental illnesses have been among the most rapidly growing segments of both the SSI and the SSDI programs. Under such circumstances, clinical interventions that promise outcomes in the form of increased labor force activity, improved earnings, and reduced reliance on publicly funded income support programs are of great interest. For this reason evidence-based supported employment programs, such as the individual placement and support model, may offer interventions that contribute to policy solutions. These interventions have been carefully studied and have repeatedly been shown to produce encouraging results with respect to improving functional, social, and economic outcomes for a segment of the population with serious and persistent mental illnesses. It has also been claimed that supported employment programs may yield substantial savings to publicly funded income support and health insurance programs.

In the search for solutions to pressing problems, such as financing the SSI and SSDI programs, policy makers must assess claims made by scholars, "policy entrepreneurs," and advocates. Policy debates aimed at reform of key programs that serve vulnerable populations commonly feature interested parties who offer policy makers a view of the "best case" but not necessarily the most likely case. If those positions are shown to be only weakly supported by evidence, the credibility of the field is diminished. It is for this reason that the article in this issue by Salkever, which summarizes evidence for the key economic outcomes of supported employment programs, is so valuable. The article equips policy makers who have "soft hearts and hard heads" with carefully analyzed and balanced information that can help them develop realistic evidence-based proposals to improve the design of disability income support programs.

The story that emerges from Salkever's article is a nuanced one. He shows that although research clearly demonstrates that supported employment is more cost-effective than vocational rehabilitation programs and that it produces a variety of beneficial social and personal outcomes, existing evidence does not support the likelihood of realizing large budgetary savings from expanding supported employment. Sometimes in health care we need to be satisfied with developing programs that simply make the lives of very sick people better at the same cost, even if we cannot promise other economic gains. Salkever's article reminds us of that point.—RICHARD G. FRANK, PH.D., *Department of Health Care Policy, Harvard Medical School, Boston*

*Psychiatric Services*, established in 1950, is published monthly by the American Psychiatric Association for mental health professionals and others concerned with treatment and services for persons with mental illnesses and mental disabilities, in keeping with APA's objectives to improve care and treatment, to promote research and professional education in psychiatric and related fields, and to advance the standards of all psychiatric services and facilities.

### Editor

Howard H. Goldman, M.D., Ph.D.

### Editorial Board

David A. Adler, M.D.

Javier I. Escobar, M.D.

Stephen M. Goldfinger, M.D.

Richard K. Harding, M.D.

Roberto Lewis-Fernández, M.D.

Grayson S. Norquist, M.D., M.S.P.H.

Martha Sajatovic, M.D.

Gregory E. Simon, M.D., M.P.H.

Bradley D. Stein, M.D., Ph.D.

Marvin S. Swartz, M.D.

Marcia Valenstein, M.D.

Bonnie T. Zima, M.D., M.P.H.

### Editor Emeritus

John A. Talbott, M.D.

### Book Review Editor

Jeffrey L. Geller, M.D., M.P.H.

### Contributing Editors

Paul S. Appelbaum, M.D., *Law & Psychiatry*

José Miguel Caldas de Almeida, M.D., and Marcela Horvitz-Lennon, M.D., M.P.H., *Mental Health Care Reforms in Latin America*

Francine Cournos, M.D., and Stephen M. Goldfinger, M.D., *Frontline Reports*

Lisa B. Dixon, M.D., M.P.H., and Brian Hepburn, M.D., *Public-Academic Partnerships*

Jeffrey L. Geller, M.D., M.P.H., *Personal Accounts*

William M. Glazer, M.D., *Best Practices*

Amy M. Kilbourne, Ph.D., M.P.H., and

Tami L. Mark, Ph.D., *Datapoints*

Matt Muijen, M.D., Ph.D., *Mental Health Care Reforms in Europe*

Fred C. Osher, M.D., *State Mental Health Policy*

Jules M. Ranz, M.D., and Susan M. Deakins, M.D., *Case Studies in Public-Sector Leadership*

Steven S. Sharfstein, M.D., Haiden A. Huskamp, Ph.D., and Alison Evans Cuellar, Ph.D., *Economic Grand Rounds*

### Statistical Consultant

Deborah R. Medoff, Ph.D.

### Editorial Consultants

Joseph M. Cerimele, M.D.

Julie M. Donohue, Ph.D.

Robert E. Drake, M.D., Ph.D.

M. Susan Ridgely, J.D.

Laura Van Tosh

### Editorial Staff

Constance Grant Gartner, *Managing Editor*

Demarie S. Jackson, *Associate Editor*

Kathleen Stearman, *Associate Editor*

Wendy Lieberman Taylor, *Production Manager*

Y. Nicole Gray, *Editorial Support Services Manager*

### Publisher

Rebecca D. Rinehart

### American Psychiatric Association

Dilip V. Jeste, M.D., *President*

Jeffrey A. Lieberman, M.D., *President-Elect*

Roger Peele, M.D., *Secretary*

David Fassler, M.D., *Treasurer*

R. Scott Benson, M.D., *Speaker, APA Assembly*

James H. Scully, M.D., *Medical Director and CEO*
